# 1 **Defining the Subtypes of Long COVID and Risk Factors for Prolonged Disease**

2 Skyler Resendez, PhD <sup>1,2</sup>, Steven H. Brown, MD <sup>3,4</sup>, H. Sebastian Ruiz <sup>1</sup>, Prahalad Rangan, PhD <sup>1,2</sup>, Jonathan  
3 R. Nebeker, MD <sup>3,5</sup>, Diane Montella, MD <sup>3</sup>, Peter L. Elkin, MD <sup>1,2,6,7</sup>

4 1. Department of Biomedical Informatics, Jacobs School of Medicine and Biomedical  
5 Sciences, University at Buffalo

6 2. Department of Veterans Affairs, VA Western New York Healthcare System and VA Research Service

7 3. Office of Health Informatics, Department of Veterans Affairs

8 4. Department of Biomedical Informatics Vanderbilt University Medical Center

9 5. Department of Medicine, University of Utah

10 6. Department of Internal Medicine, Jacobs School of Medicine and Biomedical Sciences, University at  
11 Buffalo

12 7. Faculty of Engineering, University of Southern Denmark

13

14

15

16 Word Count: 3070

17

18

19

20 Peter L. Elkin, MD, MACP, FACMI, FNYAM, FAMIA, FIAHSI

21 SUNY Distinguished Service Professor

22 UB Distinguished Professor and Chair

23 Department of Biomedical Informatics

24 Professor of Internal Medicine

25 Professor of Surgery

26 Professor of Pathology and Anatomical Sciences

27 Professor of Psychiatry

28 Professor of Orthopedics

29 President, Faculty Council

30 Jacobs School of Medicine and Biomedical Sciences

31 University at Buffalo

32 State University of New York

33 <http://medicine.buffalo.edu/departments/biomedical-informatics.html>

34 77 Goodell Street, Buffalo, NY 14203

35 507 358-1341

36 **Abstract**

37

38 **Importance:** There have been over 759 million confirmed cases of COVID-19 worldwide. A significant  
39 portion of these infections will lead to long COVID and its attendant morbidities and costs.

40 **Objective:** To empirically derive a long COVID case definition consisting of significantly increased signs,  
41 symptoms, and diagnoses to support clinical, public health, research, and policy initiatives related to the  
42 pandemic.

43 **Design:** Case-Crossover Population-based study.

44 **Setting:** Veterans Affairs (VA) medical centers across the United States between January 1, 2020 and  
45 August 18, 2022.

46 **Participants:** 367,148 individuals with positive COVID-19 tests and preexisting ICD-10-CM codes  
47 recorded in the VA electronic health record were enrolled.

48 **Trigger:** SARS-CoV-2 infection documented by positive laboratory test.

49 **Case Window:** One to seven months following positive COVID testing.

50 **Main Outcomes and Measures:** We defined signs, symptoms, and diagnoses as being associated with  
51 long COVID if they had a novel case frequency of  $\geq 1:1000$  and they were significantly increased in our  
52 entire cohort after a positive COVID test when compared to case frequencies before COVID testing. We  
53 present odds ratios with confidence intervals for long COVID signs, symptoms, and diagnoses, organized  
54 by ICD-10-CM functional groups and medical specialty. We used our definition to assess long COVID risk  
55 based upon a patient's demographics, Elixhauser score, vaccination status, and COVID disease severity.

56 **Results:** We developed a long COVID definition consisting of 323 ICD-10-CM diagnosis codes grouped  
57 into 143 ICD-10-CM functional groups that were significantly increased in our 367,148 patient post-  
58 COVID population. We define seventeen medical-specialty long COVID subtypes such as cardiology long  
59 COVID. COVID-19 positive patients developed signs, symptoms, or diagnoses included in our long COVID  
60 definition at a proportion of at least 59.7% (based on all COVID positive patients). Patients with more  
61 severe cases of COVID-19 and multiple comorbidities were more likely to develop long COVID.

62 **Conclusions and Relevance:** An actionable, empirical definition for long COVID can help clinicians screen  
63 for and diagnose long COVID, allowing identified patients to be admitted into appropriate monitoring  
64 and treatment programs. An actionable long COVID definition can also support public health, research  
65 and policy initiatives. COVID patients with low oxygen saturation levels or multiple co-morbidities should  
66 be preferentially watched for the development of long COVID.

67

## 68 **Long COVID – Current Knowledge Base and Need**

69 Numerous symptoms are cited as long-term sequela of COVID-19. “The symptoms may affect a number  
70 of organ systems, occur in diverse patterns, and frequently get worse after physical or mental activity.”<sup>1</sup>  
71 A 2020 study found that the most common long-term symptoms were fatigue, dyspnea, joint pain, and  
72 chest pain.<sup>2</sup> Others reported gastrointestinal tract disorders correlated with gut microbiome shifts after  
73 COVID-19 infection.<sup>3,4</sup> Cognitive dysfunction, often referred to as brain fog, is a commonly reported  
74 long-term symptom.<sup>5</sup> Cognitive dysfunction is particularly concerning given evidence that COVID-19 can  
75 alter brain structure.<sup>6</sup> The most common self-reported symptoms documented via a smartphone app  
76 were fatigue, headache, dyspnea, and anosmia.<sup>7,8</sup>

77 Concerningly high long COVID frequencies have been reported. A cohort study from the Netherlands  
78 found that approximately one in eight COVID-19 patients developed long-term somatic symptoms.<sup>9</sup>  
79 Another study showed that approximately thirty percent of their cohort reported persistent symptoms,  
80 with many experiencing worse health-related quality of life (HRQoL) compared with baseline and  
81 negative impacts on at least one activity of daily living.<sup>10</sup>

82 Long COVID’s impacts extend beyond individual morbidity to include healthcare system and economic  
83 consequences. Cutler et. al. noted long COVID resulting in reduced workforce participation (e.g., 44%  
84 out of the work force), direct earning losses and worker shortages in service jobs.<sup>11</sup> A recent analysis of  
85 New York State disability claims trends described in the New York Times found that “71 percent of  
86 claimants with long COVID needed continuing medical treatment or were unable to work for six months  
87 or more” and opined that long COVID has exacerbated the current US labor shortage.<sup>12,13</sup>

88 The widespread occurrence of lingering ailments and their impacts on individuals and society make clear  
89 the need for a long COVID definition. U.S. public health officials note that we must balance our need for  
90 an accurate long COVID definition that includes all afflicted individuals with against our need for interim  
91 long COVID definitions to expedite immediate action and mobilization.<sup>14</sup> In particular, a working  
92 definition of long COVID based on routinely collected coded data could support the identification of at  
93 risk or undiagnosed patients for monitoring, referral, or therapeutic interventions. In the current study  
94 we empirically derive an actionable broad-based long COVID definition to support current clinical, public  
95 health, research and policy initiatives related to the pandemic.

96

## 97 **Methods**

### 98 **Overview**

99 We enrolled Veterans who had laboratory confirmed positive COVID 19 tests. We examined Veterans’  
100 electronic health records for novel International Classification of Diseases, 10th Revision, Clinical  
101 Modification (ICD-10-CM) codes between one and seven months after a positive COVID-19 test. We  
102 grouped codes with a novel frequency of 1/1000 or greater by diagnosis type creating ICD-10-CM  
103 functional groups and performed Chi-square testing with Bonferroni correction to compare diagnosis  
104 frequencies before and after a positive COVID test. We defined ICD-10-CM functional groups that  
105 significantly increased in frequency as “upregulated” (see Figure 1). We then manually aggregated  
106 upregulated ICD-10-CM functional groups into medical specialties to organize our empiric definition of  
107 long COVID.

108

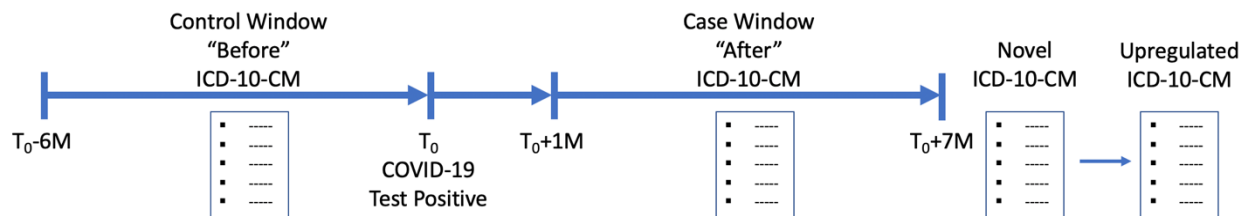

109

110 **Figure 1.** Workflow and data curation in the sequence utilized to generate our long COVID definition.  $T_0$ :  
111 Date of positive COVID-19 test. M: Months.

## 112 Population Definition and Data Extraction

113 We enrolled patients with laboratory confirmed positive COVID-19 studies and followed them for  
114 thirteen months (Six months before the COVID 19 test result and seven months after COVID) to create a  
115 long COVID definition. We utilized the electronic health records (EHR) of all patients that tested positive  
116 for COVID-19 at Veterans Affairs (VA) medical facilities nationally between January 1, 2020 and August  
117 18, 2022. 2,377,720 patients were tested for COVID-19 during this time period.

118 We applied structured query language (SQL) queries to VA Informatics and Computing Infrastructure  
119 (VINCI), Corporate Data Warehouse (CDW) data tables<sup>15</sup> to generate two diagnosis files for analysis. The  
120 first file (“before”) contains a row of retrospectively collected information for each patient and each  
121 ICD-10-CM diagnosis assigned to them in the six-month control window prior to their COVID-19 test. The  
122 row includes the ICD-10-CM code and its description, a unique patient identifier, the COVID-19 test date,  
123 and the calculated number of months between ICD-10-CM code entry and COVID-19 testing. This  
124 “before” file contained 14,980,288 observations across 426,970 patients.

125 We followed the patients for seven months. The second file (“after”) was created seven months after  
126 the last patient was enrolled. The after file contained ICD-10-CM codes assigned during the seven  
127 months following COVID-19 testing and similar related information as the “before” file. This “after” file  
128 contained 15,493,587 observations across 389,677 patients.

129 We limited analysis to the 367,148 patients that appeared in both the “before” and “after” files to  
130 ensure that we had a diagnostic history for each patient and eliminated acute findings by removing all  
131 ICD-10-CM codes documented less than a month after the positive COVID test (Figure 1). We used the  
132 date of the first positive COVID test for patients with multiple positive tests. Multiple repeating ICD-10-  
133 CM codes for a single patient were counted once. We wrote R and python programs to remove all data  
134 concerning patients who tested negative for COVID-19, ICD-10-CM codes that were documented less  
135 than a month after the positive COVID-19 test, and patients who were not present in both the “before”  
136 and “after” files. The methodology used to generate the patient cohort is depicted in Figure 2.

137

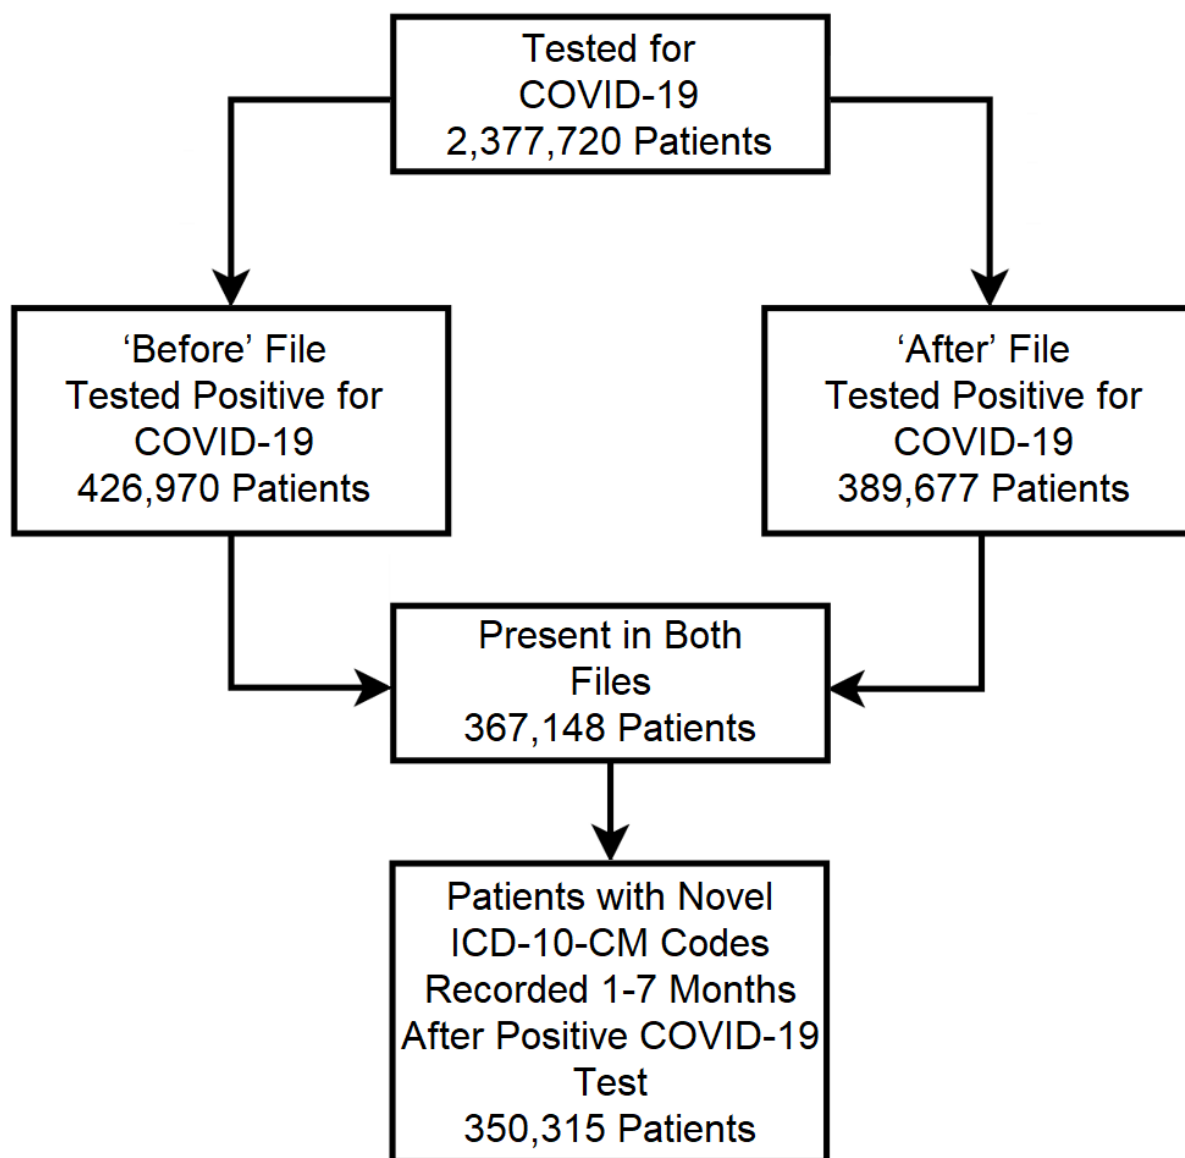

138

139 **Figure 2. Recruitment Flowchart for the Study**

140 We collected additional data to examine the association of demographics, comorbidities, vaccination  
141 status, and COVID-19 case severity with the incidence of long COVID. Demographic data collected  
142 included age, sex, race, and ethnicity. Comorbidities were evaluated using 2-year Elixhauser Comorbidity  
143 Indices Scores. Vaccinated patients were defined as having at least one COVID-19 vaccine dose recorded  
144 at least two weeks and no more than nine months before their positive COVID-19 test. We defined two  
145 classes of severe COVID-19 based on minimum recorded oxygen saturation. The first class, severe  
146 COVID-19, was defined by a minimum oxygen saturation of <94%.<sup>16</sup> The second class, severe COVID-19  
147 with severe desaturation, was defined by a minimum oxygen saturation of < 88%.<sup>17</sup>

148

## 149 **Data Analysis**

150 We chose six month “before” and “after” COVID test control and case windows to allow patients to  
151 serve as their own controls. The six month “after” case window began one month after the positive  
152 COVID test. We defined “novel” ICD-10-CM codes as those that appeared in a patient’s “after” file but  
153 not in the “before” file. We calculated the frequency of each novel ICD-10-CM code as the percentage of  
154 the study cohort assigned the code. We excluded novel codes with a frequency of < 1:1000 from further  
155 analysis. We defined codes as upregulated when the frequency of that code in the after file was  
156 significantly increased as compared to the frequency in the before file, if it had a Chi-Square with a  
157 Bonferroni corrected p-value<0.00006. All resulting codes were grouped for additional analysis and  
158 organization (see ICD-10-CM Functional and Medical Specialty Groupings subsection of Methods).

159 We also defined ICD-10-CM functional groups as “upregulated” if they were statistically more frequent  
160 post COVID by Chi Square analysis with Bonferroni correction with a p<0.00006. We limited the long  
161 COVID ICD-10-CM code functional groups to those that were significantly increased in frequency. We  
162 used “before” and “after” frequencies to calculate odds ratios and confidence intervals for each novel  
163 ICD-10-CM functional group. We calculated odds ratios from frequency data.

164 We analyzed potential risk factors including vaccination status and COVID-19 severity for long COVID by  
165 creating 2x2 tables and applying Pearson Chi-Square testing. We applied a similar approach to the  
166 analysis of demographic factors. We used R version 4.1.2 and R-Studio to perform the statistical analysis.

167

## 168 **ICD-10-CM Functional and Medical Specialty Groupings**

169 We grouped ICD10 CM codes in three steps. We first combined ICD-10-CM codes that had the same  
170 initial three characters. We then grouped ICD-10-CM codes with different initial characters if the  
171 diagnoses were functionally similar to create our ICD-10-CM functional groups. For example, we  
172 grouped I47.1 (supraventricular tachycardia), I47.2 (ventricular tachycardia), and R00.0 (tachycardia,  
173 unspecified) together as tachycardia. Finally, we manually curated each of these ICD-10-CM functional  
174 groups into medical specialties for organizational purposes.

## 175 **Long COVID Definition**

176 We included in our long COVID definition each ICD-10-CM code with an incidence over six months ( $T_0 +$   
177  $1M - T_0 + 7M$ ) > 1:1000 and a significant overall frequency increase. Long COVID patients were defined as  
178 having any of the 323 upregulated ICD-10-CM codes between two and seven months after their positive  
179 COVID-19 diagnosis, but not in their pre-COVID diagnoses.

## 180 **Risk Factors for Long COVID**

181 The multivariate regression models were done for each risk factor one including Age, Gender, Race,  
182 Ethnicity, 2-year Elixhauser score, a second with Age, Gender, Race, Ethnicity, 2-year Elixhauser score,  
183 O2Sat <94%, and a third with Age, Gender, Race, Ethnicity, 2-year Elixhauser score, COVID Vaccination  
184 status. We present the univariate rates as well as the results of the regression analysis using R4.1.2 and  
185 R Studio.

## 186 **Results**

187 **Long COVID Definition**

188 We extracted ICD-10-CM diagnosis codes assigned to 367,148 patients who underwent a positive COVID  
 189 test at VA. Patients with one or more novel COVID related diagnoses numbered 268,320. The remaining  
 190 98,828 patients had no novel long COVID ICD-10-CM diagnoses in their post-COVID period when  
 191 compared to their pre-COVID period. Table 1 contains the demographic characteristics of the study  
 192 cohort. Males were significantly older than the females on average, 60.29 (95% CI: 95% CI: 60.24 –  
 193 60.35) versus 47.85 (95% CI: 47.73 – 47.97), respectively.

|                                           | <b>Non-Long COVID Patients (98,828)</b> | <b>Long COVID Patient (268,320)</b> | <b>P Value</b> |
|-------------------------------------------|-----------------------------------------|-------------------------------------|----------------|
| <b>Age (Mean/Conf. int.)</b>              | <b>52.14 (52.03 – 52.24)</b>            | <b>60.85 (60.79 – 60.91)</b>        | -              |
| <b>Elixhauser Score (Mean/Conf. int.)</b> | <b>3.03 (2.99 – 3.07)</b>               | <b>7.05 (7.01 – 7.09)</b>           | -              |
| <b>Sex</b>                                |                                         |                                     |                |
| Male                                      | 75,418 (76.31%)                         | 234,720 (87.48%)                    | < 0.00001      |
| Female                                    | 16,854 (17.05%)                         | 31,651 (11.80%)                     | < 0.00001      |
| Not Listed                                | 6,556 (6.63%)                           | 1,949 (0.73%)                       | < 0.00001      |
| <b>Ethnicity</b>                          |                                         |                                     |                |
| Hispanic or Latino                        | 10,147 (10.27%)                         | 26,171 (9.75%)                      | < 0.00001      |
| Not Hispanic or Latino                    | 71,595 (72.44%)                         | 227,404 (84.75%)                    | < 0.00001      |
| Not Listed                                | 17,086 (17.29%)                         | 14,745 (5.50%)                      | < 0.00001      |
| <b>Race</b>                               |                                         |                                     |                |
| American Indian or Alaska Native          | 743 (0.75%)                             | 2,243 (0.84%)                       | 0.01182        |
| Asian                                     | 1,420 (1.44%)                           | 2,973 (1.11%)                       | < 0.00001      |
| Black or African American                 | 20,779 (21.03%)                         | 65,218 (24.31%)                     | < 0.00001      |
| Native Hawaiian/Other Pacific Islander    | 905 (0.92%)                             | 2,522 (0.94%)                       | 0.49900        |
| White                                     | 55,359 (56.02%)                         | 173,169 (64.54%)                    | < 0.00001      |
| Not Listed                                | 19,622 (19.85%)                         | 22,195 (8.27%)                      | < 0.00001      |

194

195 **Table 1.** Demographic data and two-year Elixhauser scores for long COVID patients and non-long COVID  
 196 patients

197 We developed a definition of long COVID consisting of 323 ICD-10-CM diagnosis codes grouped into 143  
 198 ICD-10-CM functional groups that were significantly increased in our 367,148 patient post-COVID  
 199 population. We define seventeen medical specialty long COVID subtypes including cardiology long  
 200 COVID, neurology long COVID, and pulmonary long COVID. Table 2 shows the ICD-10-CM functional  
 201 groups and medical specialties. Within each field, the ICD-10-CM code groups are sorted in descending  
 202 order by their Odds Ratios.

| <b>Functional Group Description</b> | <b>Medical Specialty</b> | <b>ICD-10-CM Codes</b> | <b>Novel Count</b> | <b>Odds Ratio</b> |
|-------------------------------------|--------------------------|------------------------|--------------------|-------------------|
| Hypotension                         | Cardiology               | I95.1, I95.89, I95.9   | 7865               | 1.271538          |



|                                     |                  |                                                                                                                          |       |          |
|-------------------------------------|------------------|--------------------------------------------------------------------------------------------------------------------------|-------|----------|
| Heart Failure Diastolic Dysfunction | Cardiology       | I11.0                                                                                                                    | 4594  | 1.26876  |
| Cardiac Arrhythmia                  | Cardiology       | I47.1, I48.0, I48.19, I48.20, I48.21, I48.3, I48.91, I48.92, I49.3, R00.0, R00.2                                         | 35648 | 1.223517 |
| Cardiovascular Disease              | Cardiology       | I21.A1, I24.8, I25.10, I25.2, I25.5, I42.8, I42.9, I50.20, I50.22, I50.23, I50.30, I50.32, I50.33, I50.42, I50.9, I71.40 | 45157 | 1.206416 |
| Valve Stenosis/Insufficiency        | Cardiology       | I27.82, I34.0, I35.0                                                                                                     | 3916  | 1.171221 |
| Peripheral Vascular Disease         | Cardiology       | I73.9                                                                                                                    | 4862  | 1.105507 |
| Hyperlipidemia                      | Cardiology       | E78.2, E78.5                                                                                                             | 54913 | 1.070793 |
| Hypertension                        | Cardiology       | I10                                                                                                                      | 39677 | 1.046517 |
| Gingival Recession                  | Dentistry        | K06.010, K06.020                                                                                                         | 2497  | 1.256852 |
| Gingivitis                          | Dentistry        | K03.0, K05.00, K05.10, K05.321, K05.322, K06.1                                                                           | 7818  | 1.235098 |
| Dental Caries                       | Dentistry        | K02.3, K02.51, K02.52, K02.62, K02.7                                                                                     | 19887 | 1.154138 |
| Pressure ulcer                      | Dermatology      | L89.152, L89.153, L89.159                                                                                                | 1639  | 2.3395   |
| Nonscarring Hair Loss               | Dermatology      | L65.9                                                                                                                    | 441   | 1.853409 |
| Melanocytic Nevi                    | Dermatology      | D22.9                                                                                                                    | 1886  | 1.195428 |
| Nail Dystrophy                      | Dermatology      | L60.3                                                                                                                    | 5209  | 1.152928 |
| Xerosis Cutis                       | Dermatology      | L85.3                                                                                                                    | 4048  | 1.133044 |
| Fatigue                             | Endocrinology    | G93.3                                                                                                                    | 542   | 10.18039 |
| Malnutrition                        | Endocrinology    | E43, E44.0, E46, E63.9, R63.8, R64                                                                                       | 6372  | 1.856287 |
| Adult Failure to Thrive             | Endocrinology    | R62.7                                                                                                                    | 1827  | 1.578271 |
| Phosphorus Metabolism Disorder      | Endocrinology    | E83.39                                                                                                                   | 1306  | 1.297077 |
| Abnormal Weight Loss                | Endocrinology    | R63.4                                                                                                                    | 4439  | 1.16755  |
| Osteoporosis                        | Endocrinology    | M81.0                                                                                                                    | 1442  | 1.120668 |
| Prediabetes                         | Endocrinology    | R73.03                                                                                                                   | 6402  | 1.105807 |
| Type 2 Diabetes Mellitus            | Endocrinology    | E11.22, E11.3291, E11.36, E11.40, E11.42, E11.51, E11.649, E11.65, E11.9                                                 | 49454 | 1.104288 |
| Hypothyroidism                      | Endocrinology    | E03.9                                                                                                                    | 7059  | 1.050629 |
| Obesity                             | Endocrinology    | E66.9                                                                                                                    | 19041 | 1.038481 |
| Ileus                               | Gastroenterology | K56.7                                                                                                                    | 693   | 1.585583 |



|                                                |                           |                                                              |       |          |
|------------------------------------------------|---------------------------|--------------------------------------------------------------|-------|----------|
| Enterocolitis                                  | Gastroenterology          | A04.72                                                       | 760   | 1.568205 |
| Elevation of Liver Transaminase Levels         | Gastroenterology          | R74.01                                                       | 2117  | 1.515881 |
| Polyp of Stomach and Duodenum                  | Gastroenterology          | K31.7                                                        | 718   | 1.339522 |
| Ascites                                        | Gastroenterology          | R18.8                                                        | 795   | 1.332139 |
| Esophagitis                                    | Gastroenterology          | K08.499, K20.80, K20.90, K22.89                              | 3013  | 1.317627 |
| Portal Hypertension                            | Gastroenterology          | K76.6                                                        | 671   | 1.291358 |
| Dysphagia                                      | Gastroenterology          | R13.10, R13.11, R13.12, R13.13                               | 13011 | 1.274248 |
| Constipation                                   | Gastroenterology          | K59.00, K59.03, K59.09                                       | 13376 | 1.224596 |
| Diseases of Stomach and Duodenum               | Gastroenterology          | K31.89                                                       | 1394  | 1.193473 |
| Gastritis                                      | Gastroenterology          | K29.50, K29.70                                               | 2963  | 1.191019 |
| Gastrointestinal Hemorrhage                    | Gastroenterology          | K92.2                                                        | 2320  | 1.186902 |
| Diverticulosis                                 | Gastroenterology          | K57.30                                                       | 5522  | 1.168767 |
| Melena                                         | Gastroenterology          | K92.1                                                        | 2334  | 1.143609 |
| Cirrhosis of Liver                             | Gastroenterology          | K74.60                                                       | 1683  | 1.13734  |
| Gastro-Esophageal Reflux Disease               | Gastroenterology          | K21.00, K21.9                                                | 31020 | 1.086091 |
| Fatty Liver                                    | Gastroenterology          | K76.0                                                        | 4912  | 1.081379 |
| Homelessness                                   | General Internal Medicine | Z59.00, Z59.01, Z59.02, Z59.811, Z59.812, Z59.819, Z59.89    | 11511 | 1.456793 |
| Vitamin Deficiency                             | General Internal Medicine | E53.8, E55.9                                                 | 21619 | 1.105953 |
| Pulmonary Embolism without Acute Cor Pulmonale | Hematology                | I26.99                                                       | 2670  | 1.804971 |
| MGUS                                           | Hematology                | E88.09, R77.8                                                | 1273  | 1.542297 |
| Acute Embolism and Thrombosis                  | Hematology                | I82.401, I82.402, I82.409, I82.890                           | 2510  | 1.42562  |
| Pancytopenia                                   | Hematology                | D61.818                                                      | 939   | 1.291209 |
| Thrombocytopenia                               | Hematology                | D69.59, D69.6                                                | 3876  | 1.260737 |
| Abnormal Coagulation Profile                   | Hematology                | R79.1                                                        | 826   | 1.250246 |
| Anemia                                         | Hematology                | D50.0, D50.9, D53.9, D62, D63.0, D63.1, D63.8, D64.89, D64.9 | 30750 | 1.242379 |
| Abnormal White Blood Cell Count                | Hematology                | D72.829                                                      | 3528  | 1.167524 |

|                                                       |                     |                                                                                               |       |          |
|-------------------------------------------------------|---------------------|-----------------------------------------------------------------------------------------------|-------|----------|
| Infectious Sequelae                                   | Infectious Diseases | B94.8                                                                                         | 606   | 23.42175 |
| Viral Pneumonia                                       | Infectious Diseases | J12.89                                                                                        | 1604  | 2.478623 |
| Influenza                                             | Infectious Diseases | J09.X2                                                                                        | 547   | 2.193782 |
| Thrush                                                | Infectious Diseases | B37.0                                                                                         | 537   | 1.844434 |
| Sepsis                                                | Infectious Diseases | A41.89, A41.9, R65.20, R65.21                                                                 | 6816  | 1.608247 |
| Pseudomonas                                           | Infectious Diseases | B96.5                                                                                         | 682   | 1.595698 |
| Enterococcus                                          | Infectious Diseases | B95.2                                                                                         | 884   | 1.594505 |
| Bacterial Pneumonia                                   | Infectious Diseases | J15.9                                                                                         | 2862  | 1.54475  |
| MRSA                                                  | Infectious Diseases | B95.62, Z22.322                                                                               | 1316  | 1.488166 |
| Bacteremia                                            | Infectious Diseases | R78.81                                                                                        | 2139  | 1.377602 |
| Klebsiella                                            | Infectious Diseases | B96.1                                                                                         | 728   | 1.376463 |
| MSSA                                                  | Infectious Diseases | B95.61, B95.7                                                                                 | 1015  | 1.341265 |
| Proteus                                               | Infectious Diseases | B96.4                                                                                         | 511   | 1.336283 |
| E. Coli                                               | Infectious Diseases | B96.20                                                                                        | 1077  | 1.319389 |
| Osteomyelitis                                         | Infectious Diseases | M86.9                                                                                         | 1121  | 1.224393 |
| Urinary Tract Infection                               | Infectious Diseases | N39.0, T83.511A                                                                               | 8553  | 1.161612 |
| Drug Toxicity                                         | Nephrology          | T38.0X5A, T45.1X5A                                                                            | 1073  | 1.686641 |
| Dehydration                                           | Nephrology          | E86.1                                                                                         | 959   | 1.293327 |
| Acute Kidney Failure                                  | Nephrology          | N17.0, N17.8, N17.9                                                                           | 11392 | 1.290399 |
| Disorders of Fluid, Electrolyte and Acid-Base Balance | Nephrology          | E83.42, E83.52, E87.0, E87.1, E87.2, E87.20, E87.3, E87.4, E87.5, E87.6, E87.70, E87.8        | 25885 | 1.276923 |
| Chronic Kidney Disease                                | Nephrology          | I12.0, I12.9, I13.0, I13.2, N18.2, N18.30, N18.31, N18.32, N18.4, N18.6, N18.9, N28.89, Z99.2 | 35590 | 1.258035 |
| Edema                                                 | Nephrology          | R60.0, R60.9                                                                                  | 11683 | 1.116561 |
| Encephalopathy                                        | Neurology           | G92.8, G93.40, G93.41, G93.49                                                                 | 4476  | 1.705173 |

|                                        |               |                                                                   |       |          |
|----------------------------------------|---------------|-------------------------------------------------------------------|-------|----------|
| Delirium                               | Neurology     | F05                                                               | 1414  | 1.639297 |
| Lower Back Pain                        | Neurology     | M54.50                                                            | 24694 | 1.578581 |
| Muscle Weakness                        | Neurology     | M62.81                                                            | 9362  | 1.277051 |
| Need for Assistance with Personal Care | Neurology     | Z74.1                                                             | 3287  | 1.276263 |
| Weakness                               | Neurology     | R53.1, R54                                                        | 15912 | 1.258534 |
| Cognitive Impairment                   | Neurology     | R41.0, R41.81, R41.82, R41.841, R41.89, R41.9                     | 10045 | 1.241561 |
| Wheelchair                             | Neurology     | Z99.3                                                             | 654   | 1.234073 |
| Seizure Disorder                       | Neurology     | G40.909                                                           | 1155  | 1.205124 |
| Dementia                               | Neurology     | F01.50, F02.80, F03.90, G30.9, G31.84                             | 10406 | 1.204819 |
| Falls                                  | Neurology     | R29.6                                                             | 1879  | 1.199129 |
| Difficulty in Walking                  | Neurology     | R26.2, R26.89, R26.9, Z74.09                                      | 22449 | 1.171356 |
| Falling                                | Neurology     | Z91.81                                                            | 3164  | 1.157633 |
| Tinnitus                               | Neurology     | H93.13                                                            | 8889  | 1.135359 |
| Cerebrovascular Disease                | Neurology     | I63.9, I69.351, I69.354                                           | 4200  | 1.119552 |
| Neuropathy                             | Neurology     | G62.9, G89.18, G89.29, G89.3, G89.4                               | 23681 | 1.118604 |
| Cervicalgia                            | Neurology     | M54.2                                                             | 13691 | 1.052616 |
| Malignant Neoplasm of Liver            | Oncology      | C78.7                                                             | 420   | 1.704389 |
| Malignant Neoplasm of Lung             | Oncology      | C34.90                                                            | 657   | 1.350535 |
| Malignant Neoplasm of Bone             | Oncology      | C79.51                                                            | 622   | 1.314306 |
| Solitary Pulmonary Nodule              | Oncology      | R91.1                                                             | 5557  | 1.116382 |
| Conjunctivitis                         | Ophthalmology | H10.45                                                            | 2645  | 1.180325 |
| Retinopathy                            | Ophthalmology | H35.372, H35.373                                                  | 2413  | 1.173309 |
| Dry Eye Syndrome                       | Ophthalmology | H04.123                                                           | 19581 | 1.164934 |
| Presbyopia                             | Ophthalmology | H52.4                                                             | 36752 | 1.154351 |
| Myopia                                 | Ophthalmology | H52.13                                                            | 8012  | 1.151422 |
| Vitreous Degeneration                  | Ophthalmology | H43.813                                                           | 3085  | 1.142235 |
| Astigmatism                            | Ophthalmology | H52.203, H52.223                                                  | 13737 | 1.140477 |
| Unspecified Disorder of Refraction     | Ophthalmology | H52.7                                                             | 7093  | 1.126198 |
| Open Angle with Borderline Findings    | Ophthalmology | H40.013                                                           | 6278  | 1.121644 |
| Cataracts                              | Ophthalmology | H25.012, H25.11, H25.12, H25.13, H25.811, H25.812, H25.813, H26.9 | 42904 | 1.119152 |
| Hypermetropia                          | Ophthalmology | H52.03                                                            | 7317  | 1.110326 |

|                                                |                         |                                                                                |       |          |
|------------------------------------------------|-------------------------|--------------------------------------------------------------------------------|-------|----------|
| Epistaxis                                      | Otolaryngology          | R04.0                                                                          | 1342  | 1.235389 |
| Dysphonia                                      | Otolaryngology          | R49.0                                                                          | 1368  | 1.182724 |
| Impacted Cerumen                               | Otolaryngology          | H61.23                                                                         | 3780  | 1.121918 |
| Sensorineural Hearing Loss                     | Otolaryngology          | H90.3, H90.A22                                                                 | 17093 | 1.1138   |
| Restlessness and Agitation                     | Psychiatry / Psychology | R45.1                                                                          | 893   | 1.279866 |
| Mental Disorder                                | Psychiatry / Psychology | F09, F32.A, F41.1, F41.9, F43.12                                               | 48256 | 1.135075 |
| Malaise                                        | Psychiatry / Psychology | R53.81                                                                         | 2251  | 1.132321 |
| Problems Related to Psychosocial Circumstances | Psychiatry / Psychology | Z65.8, Z65.9                                                                   | 23892 | 1.102123 |
| Acute Respiratory Distress Syndrome            | Pulmonary               | J80                                                                            | 688   | 5.299347 |
| Dependence on Ventilator                       | Pulmonary               | Z99.11                                                                         | 427   | 3.146519 |
| Chronic Cough                                  | Pulmonary               | R05.3                                                                          | 2113  | 2.026076 |
| Respiratory Failure                            | Pulmonary               | J96.00, J96.01, J96.02, J96.10, J96.11, J96.20, J96.21, J96.22, J96.90, J96.91 | 14882 | 1.997749 |
| Dependence on Supplemental Oxygen              | Pulmonary               | R09.02, Z99.81                                                                 | 7792  | 1.715279 |
| Interstitial Pulmonary Disease                 | Pulmonary               | J84.9                                                                          | 685   | 1.536233 |
| Pulmonary Fibrosis                             | Pulmonary               | J84.10                                                                         | 1232  | 1.527598 |
| Pleural Effusion                               | Pulmonary               | J90, J91.8                                                                     | 2990  | 1.4413   |
| Abnormalities of Breathing                     | Pulmonary               | R06.89                                                                         | 1107  | 1.338466 |
| Pneumonia                                      | Pulmonary               | J16.8, J17, J18.8, J18.9, J69.0                                                | 8181  | 1.315208 |
| Acute Pulmonary Edema                          | Pulmonary               | J81.0                                                                          | 624   | 1.295683 |
| Pulmonary Hypertension                         | Pulmonary               | I27.20                                                                         | 1782  | 1.282603 |
| Respiratory Disorders                          | Pulmonary               | J98.4, J98.8, J98.9                                                            | 3711  | 1.281901 |
| Emphysema                                      | Pulmonary               | J43.9                                                                          | 1700  | 1.229811 |
| Dyspnea                                        | Pulmonary               | R06.00, R06.02, R06.03, R06.09                                                 | 27926 | 1.206525 |
| Atelectasis                                    | Pulmonary               | J98.11                                                                         | 1766  | 1.206262 |
| Diaphragmatic Hernia                           | Pulmonary               | K44.9                                                                          | 2952  | 1.169074 |
| Chronic Obstructive Pulmonary Disease          | Pulmonary               | J44.0, J44.9                                                                   | 12639 | 1.131736 |
| Asthma                                         | Pulmonary               | J45.909                                                                        | 4126  | 1.093696 |
| Sleep Disorders                                | Pulmonary               | G47.00, G47.33                                                                 | 41147 | 1.090759 |
| Osteoarthritis                                 | Rheumatology            | M17.0                                                                          | 4546  | 1.090886 |
| Gout                                           | Rheumatology            | M10.9                                                                          | 5997  | 1.057874 |
| Uropathy                                       | Urology                 | N13.9                                                                          | 597   | 1.256139 |
| Retention of Urine                             | Urology                 | R33.8, R33.9                                                                   | 6269  | 1.251816 |

|                                 |         |              |       |          |
|---------------------------------|---------|--------------|-------|----------|
| Obstructive and Reflux Uropathy | Urology | N13.8        | 1385  | 1.204741 |
| Urinary Incontinence            | Urology | N31.9, R32   | 3843  | 1.153016 |
| Benign Prostatic Hyperplasia    | Urology | N40.0, N40.1 | 24210 | 1.128437 |
| Frequency of Micturition        | Urology | R35.0        | 3032  | 1.106673 |

203

204

205 **Table 2.** Long COVID definition results by ICD-10-CM Functional group description and medical specialty.

206 Figures 3 and 4 show the signs, symptoms, and diagnoses with significantly increased relative risks in the

207 post-COVID period with their respective confidence intervals sorted by medical specialty.

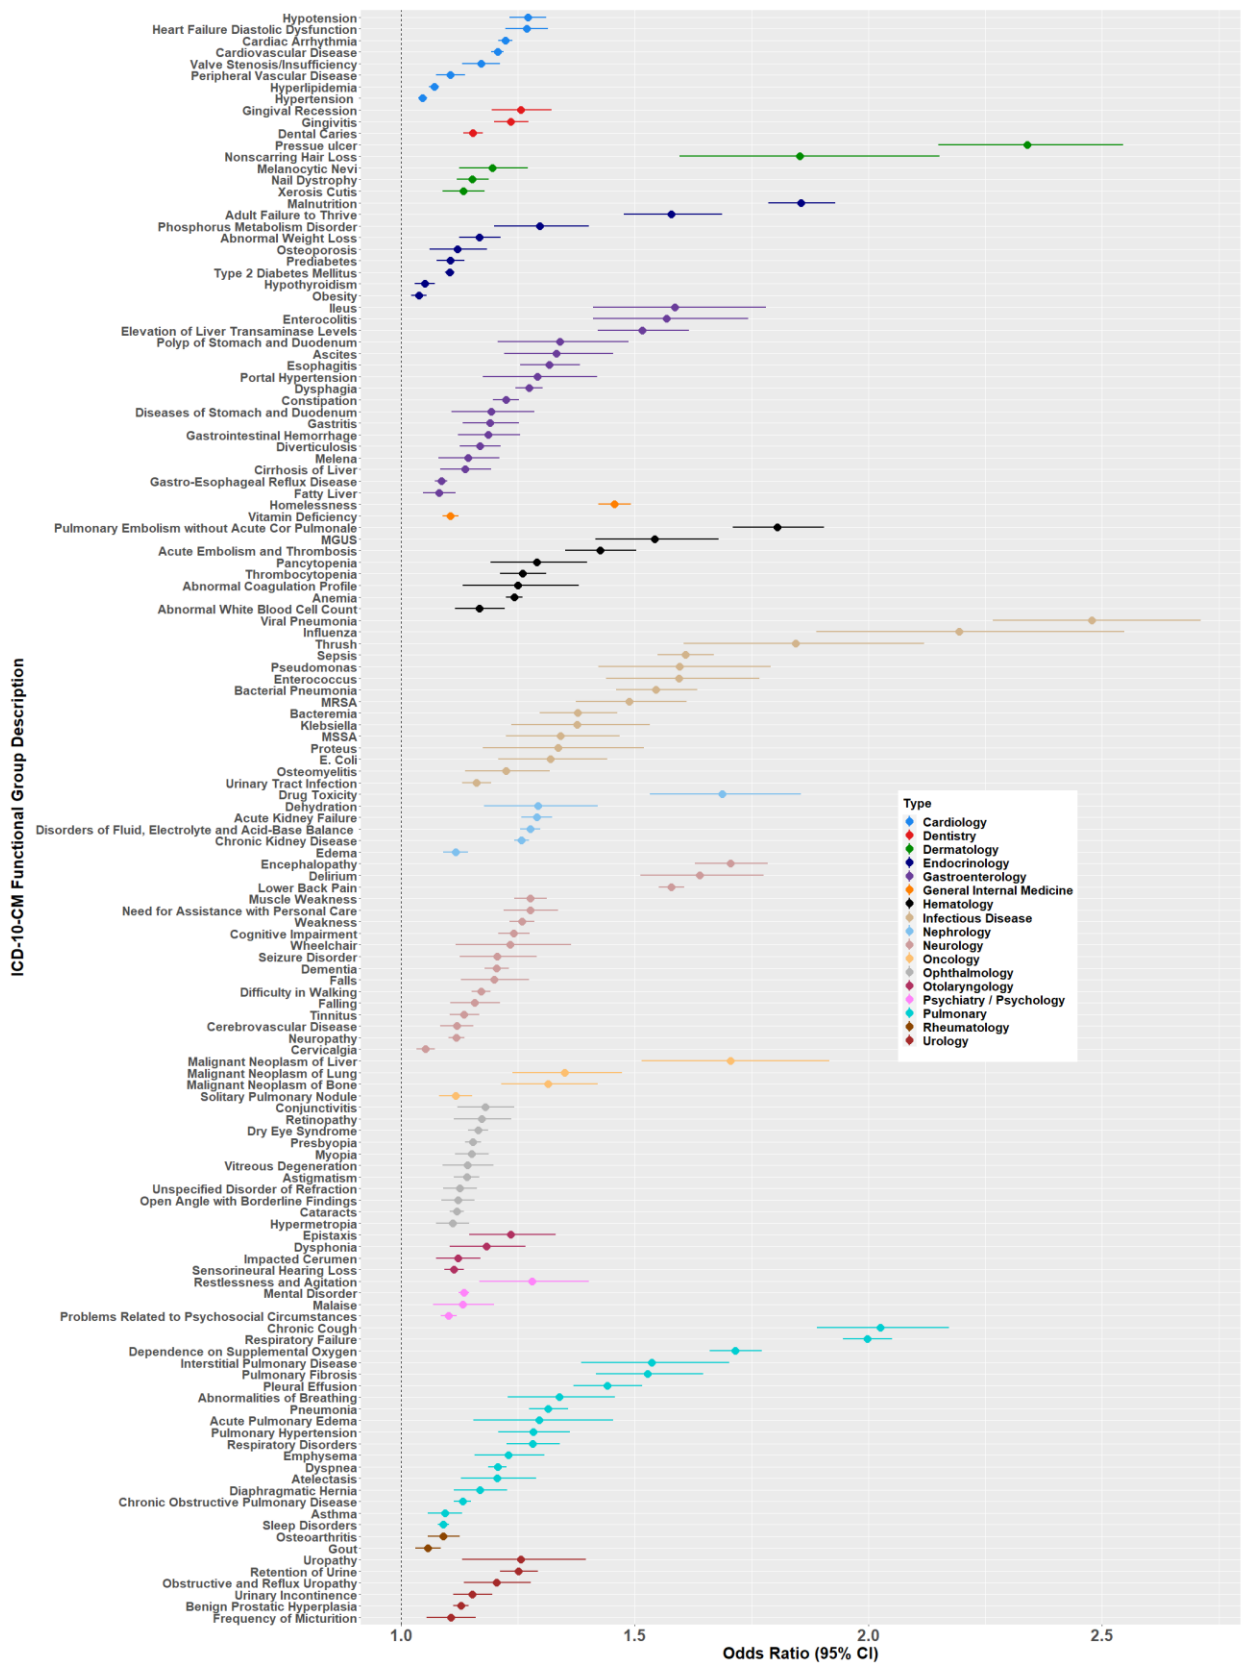

208

209

**Figure 3.** Odds ratios < 3 for long COVID ICD-10-CM functional groups by medical specialty subtype.

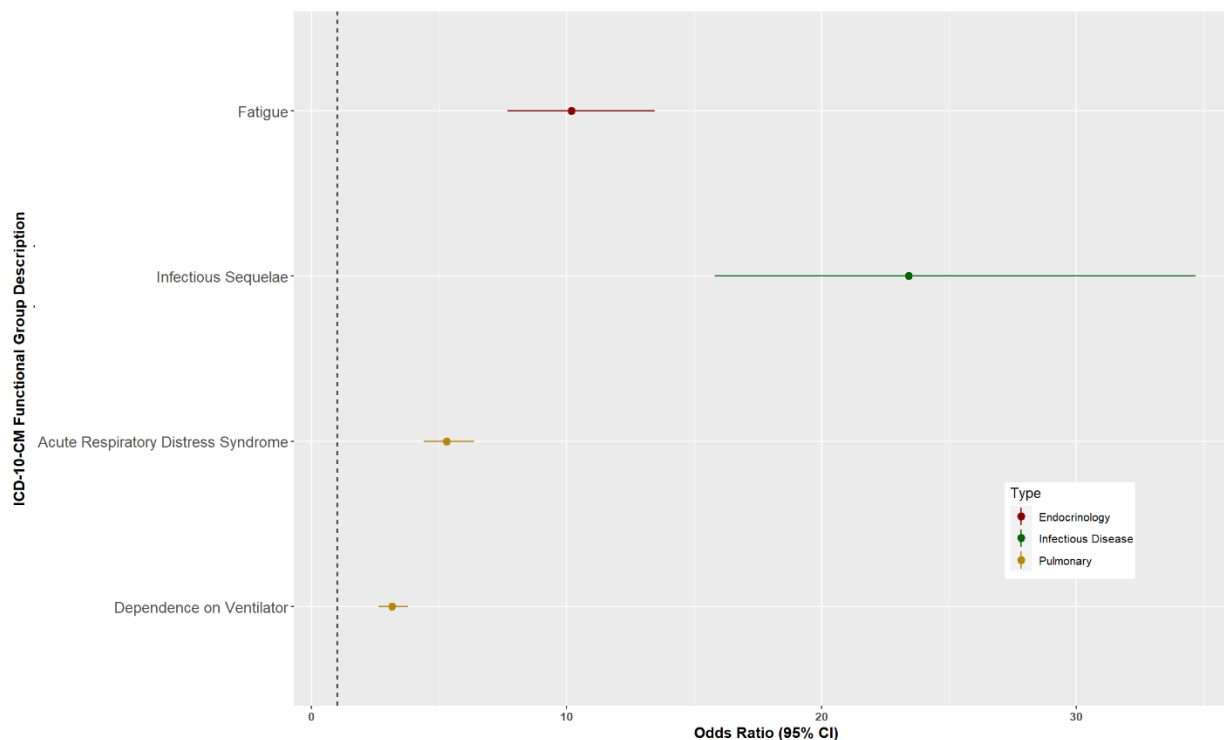

210

211 **Figure 4.** Odds ratios > 3 for long COVID ICD-10-CM functional groups by medical specialty subtype.

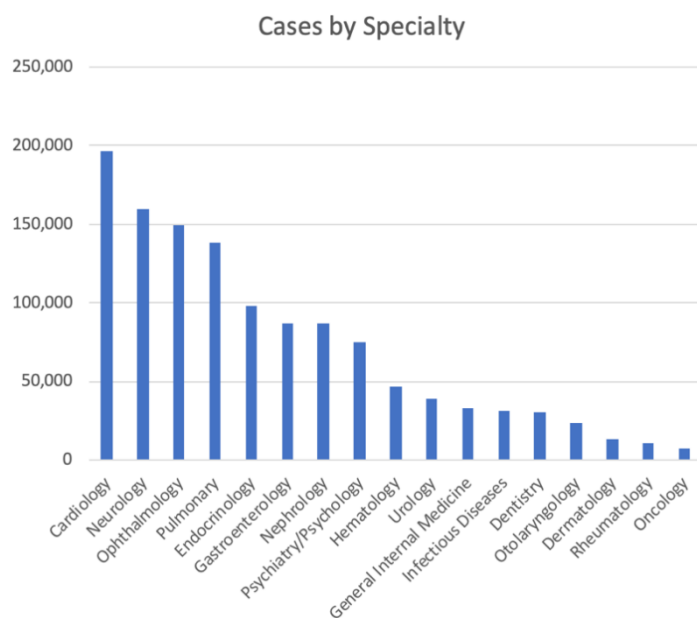

212

213 **Figure 5.** Case counts by medical specialty

214 Case counts were greatest for the specialties of Cardiology (196,632, Neurology (159,358),  
 215 Ophthalmology (149,817) and Pulmonary (138,470). The lowest case counts were for Oncology (7,256),  
 216 Rheumatology (10,543) and Dermatology (13,233).



217 COVID-19 test positive patients were assigned novel signs, symptoms, or diagnoses included in our  
 218 definition of long COVID at a rate of between 59.7% (percentage based on COVID positive patients  
 219 tested at the VA) and 76.6% (percentage based on all COVID positive patients with diagnostic history  
 220 and follow up diagnoses one to seven months after test).

221 Most long COVID patients were documented with at least one ICD-10-CM code found in our long COVID  
 222 definition within three months of their positive COVID-19 test. The percentage of patients documented  
 223 with their first long COVID ICD-10-CM code decreases with each subsequent month (See Figure 6).

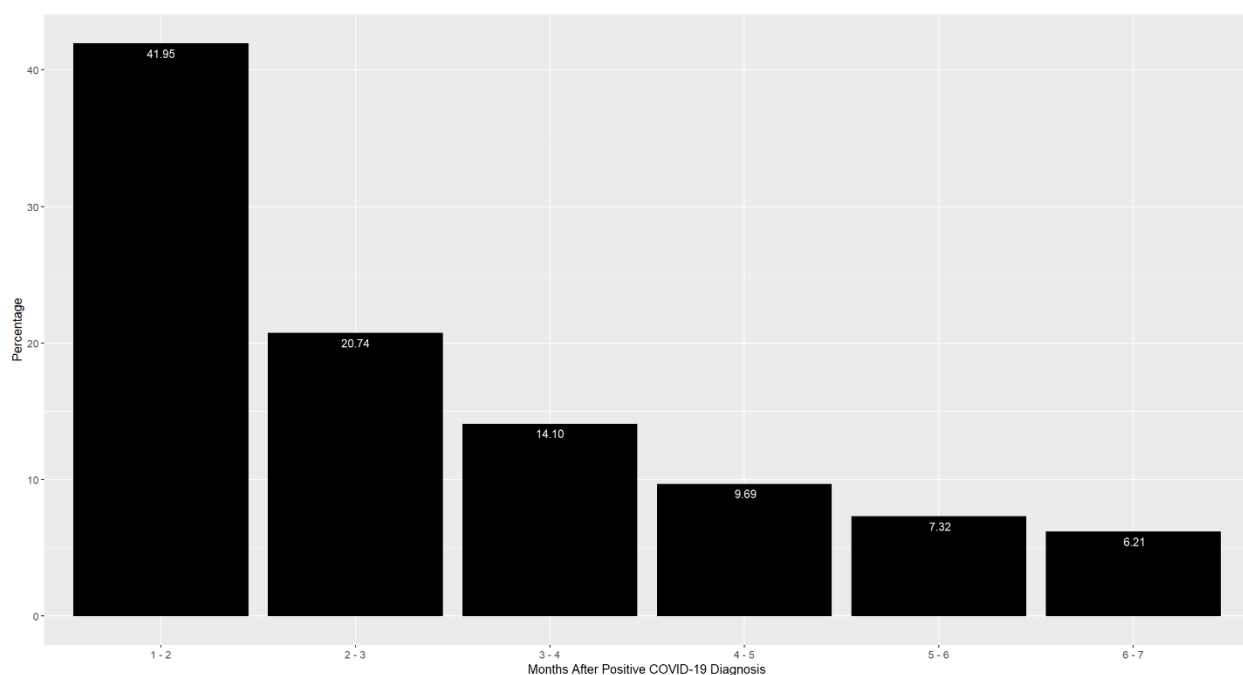

224  
 225 **Figure 6.** Percentage of prospective post COVID-19 diagnosis (Months 1-7) that each long COVID patient  
 226 had their first long COVID ICD-10-CM code documented. Month 0-1 ICD-10-CM codes were not included  
 227 as they included acute symptoms.

228  
 229 **Risk Factors for Long COVID**

230 We presented in Table 1 a comparison of demographic characteristics and Elixhauser comorbidity scores  
 231 of long COVID patients and non-long COVID patients. The long COVID cohort was older with more  
 232 comorbidities. The long COVID cohort also had higher percentages of White and Black individuals and  
 233 non-Hispanic and non- Latino ethnicities. Patients with a 2-year Elixhauser score of greater than 21 had a  
 234 much higher proportion developing long COVID ( $p < 0.001$ , Pearson Chi-Square) (See Table 3).

| 2 Year Elixhauser Score | No Long COVID Count | Long COVID Count | Percent Long COVID (95% CI) |
|-------------------------|---------------------|------------------|-----------------------------|
| 0-21                    | 96,055              | 242,108          | 71.60% (71.44% - 71.75%)    |
| 22-42                   | 2,454               | 22,716           | 90.25% (89.88% - 90.61%)    |
| 43-63                   | 308                 | 3,317            | 91.50% (90.55% - 92.36%)    |
| 64-84                   | 11                  | 179              | 94.21% (89.93% - 96.77%)    |

235 **Table 3.** Proportion of patients that developed long COVID comparing different 2-year Elixhauser score  
236 ranges.

237 Our data did not indicate that vaccination was protective against the development of long COVID.  
238 However, vaccination resulted in significantly lower rates of novel ARDS in the post-covid period (13.2%  
239 CI: 10.4%-16.9%) as compared with the unvaccinated population (19.6% CI: 18.1% - 21.2),  $p < 0.001$ .

240 Patients with minimum O2 saturations constituting severe COVID and severe COVID with severe  
241 desaturation were significantly more likely to develop long COVID (both had  $p$ -values  $< 0.001$ , Pearson  
242 Chi-Square) (See Table 4).

| Severe COVID                             | No Long COVID Count | Long COVID Count | Percent Long COVID (95% CI) |
|------------------------------------------|---------------------|------------------|-----------------------------|
| Low O2 (NIH Definition*)                 | 3,903               | 29,411           | 88.28 % (87.93% - 88.63%)   |
| No Low O2 (NIH Definition*)              | 94,925              | 238,909          | 71.57% (71.41% - 71.72%)    |
| Low O2 (Severe Desaturation**)           | 637                 | 5,566            | 89.73% (88.95% - 90.46%)    |
| No Low O2 (Severe Desaturation**)        | 98,191              | 262,754          | 72.80% (72.65% - 72.94%)    |
| * Min(O2 Sat) < 94% ** Min(O2 Sat) < 88% |                     |                  |                             |

243 **Table 4.** Low oxygen saturations and the proportion of patients that developed long COVID.

244 The multivariate regression models all confirmed that COVID patients during the Omicron variant  
245 predominant period were at slightly higher risk of developing Long COVID at  $p$ -value  $< 0.001$ .

## 246 Discussion

247 Numerous reports document specialty-specific signs, symptoms and diagnoses correlated with long  
248 COVID. We present a novel analysis based on a large national data set and the full multispecialty  
249 breadth of ICD-10-CM diagnosis codes to create an overall holistic long COVID definition that confirms  
250 and extends previous reports.

251 We allowed patients to be their own controls and used the entire cohort before and after COVID-19  
252 infection to determine the relative risk of signs, symptoms, and disorders. This ensured that the signal  
253 was both novel and upregulated. We found COVID-19 positive patients developed signs, symptoms, or  
254 diagnoses included in our long COVID definition at a proportion of between 59.7% (percentage based on  
255 COVID positive patients tested at the VA) and 76.6% (percentage based on all COVID positive patients  
256 with diagnostic history and follow up diagnoses one to seven months after test). More than three-  
257 fourths of long COVID patients met our long COVID definition within four months of their positive  
258 COVID-19 test.

259 We found long COVID frequency differences based on race and ethnicity. These differences may be  
260 related to socioeconomic status, which is directly correlated with the presence of comorbidities.<sup>18-20</sup> The  
261 long COVID cohort was eight years older with more comorbidities (two-year Elixhauser score 7.97 in the  
262 long Covid patients vs 4.21 in the non-long Covid patients). In our cohort, the males were significantly  
263 older than the females on average, 60.29 (95% CI: 95% CI: 60.24 – 60.35) versus 47.85 (95% CI: 47.73 –  
264 47.97), respectively. We found that long COVID frequency was increased in female patients, the more  
265 severely ill, and patients who had a more severe bout of COVID as judged by their minimum oxygen  
266 saturation.

267 We found 143 upregulated diagnostic groups, with odds ratios as high as 23. We also found seventeen  
268 upregulated medical specialty groupings containing between three and twenty-one signs, symptoms, or  
269 diagnoses. This provides strong evidence for a broad definition of long COVID.

270 Carfi et al. found that most common long-term symptoms were fatigue, dyspnea, joint pain, and chest  
271 pain.<sup>2</sup> Each except joint pain is represented in our long COVID definition. However, joint pain may be  
272 related to findings in our definition such as difficulty walking and an overall decrease in mobility. COVID-  
273 19 is known to cause lung abnormalities, especially in cases with pneumonia.<sup>21</sup> We found that the  
274 likelihood of developing pneumonia after COVID-19 infection is significantly upregulated, potentially  
275 interconnected with the numerous findings in our Pulmonary long COVID definition. Autopsy evaluation  
276 of COVID-19 victims' lung tissue demonstrated diffuse alveolar damage with perivascular T-cell  
277 infiltration and severe endothelial injury.<sup>22</sup> Long COVID patients have been found to have abnormal  
278 <sup>129</sup>Xe MRI gas exchange and CT vascular density measurements, which we postulate could be related to  
279 the pulmonary fibrosis (J84.10) or emphysema (J43.9) diagnoses identified in our definition.<sup>23</sup>

280 Our definition shows that the long-term effects of COVID-19 are associated with damage to numerous  
281 body systems including the kidneys, heart, eyes, and nervous system. Our results are corroborated by  
282 other studies. Cognitive dysfunction (brain fog) is often associated with long COVID and can be difficult  
283 to diagnose and treat.<sup>5</sup> COVID-19 infection is far more likely to cause cardiac complications than  
284 vaccination.<sup>24</sup> The gastrointestinal codes we observed reflect previous literature<sup>25</sup> and may relate to  
285 reported alterations to the gastrointestinal tract after COVID-19.<sup>3,4</sup> Finally, previous studies have noted  
286 that COVID can alter ocular physiology, supporting our ophthalmology related findings.<sup>26</sup>

287 Patients with more severe cases of COVID 19, as manifest by low oxygen saturations, should be watched  
288 carefully for the development of long COVID as they were significantly more likely to develop long  
289 COVID. Sicker patients with higher 2-year Elixhauser scores were significantly more likely to develop long  
290 COVID. Patients with multiple comorbidities should be made aware of this risk and participate in active  
291 surveillance for the development of signs and symptoms of long COVID.

292 The American Medical Association (AMA) notes there are three categories of long COVID patients: Those  
293 who do not recover completely and have ongoing symptoms; those with symptoms related to chronic  
294 hospitalization; and those who develop new symptoms after recovery.<sup>27</sup> In our study, we did not  
295 differentiate by these subtypes and instead leave that to future research. It is possible that some of  
296 these signs and symptoms may have occurred during the first month and may be the persistent subtype.  
297 It is possible that some of the upregulated codes may be found with other serious illnesses, though only  
298 9.1% of our cohort had severe COVID based on oxygen saturation <94%. We are not able to distinguish  
299 conditions that represent acceleration of pre-existing disease from those that represent de novo COVID-  
300 related conditions. For example, is the increased incidence of Non-ST elevation (NSTEMI) myocardial  
301 infarction (I21.4) related to the general stress of acute illness impacting preexisting coronary artery  
302 disease or to an underlying de novo long COVID related condition? Better understanding will require  
303 additional research. In any event, whether causal or associative, de novo disease or exacerbation of  
304 chronic disease, new or persistent clinical problems require assessment, treatment, and monitoring.

305 Limitations include that the cohort study population is 84% male, reflective of the overall VA patient  
306 population which is between 87% and 95% male (depending upon data source and whether gender has  
307 been self-reported).<sup>28,29</sup> Additionally, the male Veteran population who use the VA healthcare system is  
308 older than the population of female Veterans who use VA. Our study did not include home testing for

309 Covid-19 that went unreported to the VA healthcare system. Patients who tested positive during the  
310 omicron dominant time period were slightly more likely to develop Long COVID when compared to the  
311 earlier strains (76% vs 72%,  $p < 0.001$ ). The reality of emerging viral variants emphasizes the need for a  
312 well-defined and well-maintained definition of long COVID over time and with variant-specific  
313 derivation. The study was not powered to show independence of the individual risk factors for long  
314 COVID.

315 In this case-crossover study, we hope that our empirically defined long COVID definition will lead to  
316 more consistent identification of long COVID and its medical specialty subtypes and support of a variety  
317 of COVID related initiatives. Our definition is actionable as individuals who have multiple co-morbidities  
318 and more severe bouts of COVID should be followed more closely for the development of long covid  
319 signs or symptoms. Our definition can also inform screening questions for high-risk patients. For  
320 example, helping clinicians identify patients with enhanced long COVID risk who may benefit from  
321 monitoring programs or patients with previously undiagnosed long COVID for whom it may be  
322 appropriate to create a referral to a long COVID clinic. We also anticipate that our long COVID definition  
323 may support through standardization of future subspecialty specific long COVID research.

324 Future research should look at health outcomes for each long COVID medical specialty subtypes to  
325 identify those at greatest risk of developing severe morbidity. Predictive analytics should be employed  
326 to help refer these individuals earlier to monitoring and treatment programs.

327 As of March 5<sup>th</sup>, 2023, there have been 759 million confirmed cases of COVID-19 worldwide.<sup>30</sup> Case  
328 counts are ever increasing. As Dr. Levine notes, immediately useful long COVID definitions are needed as  
329 are ultimately more fully inclusive definitions.<sup>14</sup> We offer our long COVID definition as a public health  
330 contribution to our pandemic response.

331

### 332 **Acknowledgements**

333 This work has been supported in part by grants from NIH NLM T15LM012495, R25LM014213, NIAAA  
334 R21AA026954, R33AA0226954 and NCATS UL1TR001412. This study was funded in part by the  
335 Department of Veterans Affairs.

336

### 337 **References**

- 338 1. Phillips S, Williams MA. Confronting Our Next National Health Disaster — Long-Haul Covid. *New*  
339 *England Journal of Medicine* 2021;385(7):577–9.
- 340 2. Carfi A, Bernabei R, Landi F. Persistent Symptoms in Patients After Acute COVID-19. *JAMA*  
341 2020;324(6):603.
- 342 3. Ng SC, Tilg H. COVID-19 and the gastrointestinal tract: more than meets the eye. *Gut*  
343 2020;69(6):973–4.
- 344 4. Villapol S. Gastrointestinal symptoms associated with COVID-19: impact on the gut microbiome.  
345 *Translational Research* 2020;226:57–69.

- 346 5. Davis HE, Assaf GS, McCorkell L, et al. Characterizing long COVID in an international cohort: 7  
347 months of symptoms and their impact. *EClinicalMedicine* 2021;38:101019.
- 348 6. Douaud G, Lee S, Alfaro-Almagro F, et al. SARS-CoV-2 is associated with changes in brain  
349 structure in UK Biobank. *Nature* 2022;604(7907):697–707.
- 350 7. Menni C, Valdes AM, Freidin MB, et al. Real-time tracking of self-reported symptoms to predict  
351 potential COVID-19. *Nat Med* 2020;26(7):1037–40.
- 352 8. Sudre CH, Murray B, Varsavsky T, et al. Attributes and predictors of long COVID. *Nat Med*  
353 2021;27(4):626–31.
- 354 9. Ballering A v, van Zon SKR, olde Hartman TC, Rosmalen JGM. Persistence of somatic symptoms  
355 after COVID-19 in the Netherlands: an observational cohort study. *The Lancet*  
356 2022;400(10350):452–61.
- 357 10. Logue JK, Franko NM, McCulloch DJ, et al. Sequelae in Adults at 6 Months After COVID-19  
358 Infection. *JAMA Netw Open* 2021;4(2):e210830.
- 359 11. Cutler DM. The Costs of Long COVID. *JAMA Health Forum* 2022;3(5):e221809.
- 360 12. Belluck P. Long Covid Is Keeping Significant Numbers of People Out of Work, Study Finds. *New*  
361 *York Times*. 2023;
- 362 13. SHINING A LIGHT ON LONG COVID: An Analysis of Workers' Compensation Data [Internet]. 2023  
363 [cited 2023 Jan 29]. Available from: [nysif.com](https://nysif.com)
- 364 14. Levine RL. Addressing the Long-term Effects of COVID-19. *JAMA* 2022;
- 365 15. Souden M. Overview of VA Data, Information Systems, National Databases and Research Uses.  
366 2017;
- 367 16. Clinical Spectrum of SARS-CoV-2 Infection [Internet]. 2022 [cited 2023 Jan 30]; Available from:  
368 <https://www.covid19treatmentguidelines.nih.gov/overview/clinical-spectrum/>
- 369 17. A Randomized Trial of Long-Term Oxygen for COPD with Moderate Desaturation. *New England*  
370 *Journal of Medicine* 2016;375(17):1617–27.
- 371 18. Sahni S, Talwar A, Khanijo S, Talwar A. Socioeconomic status and its relationship to chronic  
372 respiratory disease. *Adv Respir Med* 2017;85(2):97–108.
- 373 19. Leng B, Jin Y, Li G, Chen L, Jin N. Socioeconomic status and hypertension. *J Hypertens*  
374 2015;33(2):221–9.
- 375 20. Jaffiol C, Thomas F, Bean K, Jégo B, Danchin N. Impact of socioeconomic status on diabetes and  
376 cardiovascular risk factors: Results of a large French survey. *Diabetes Metab* 2013;39(1):56–62.
- 377 21. Ding X, Xu J, Zhou J, Long Q. Chest CT findings of COVID-19 pneumonia by duration of symptoms.  
378 *Eur J Radiol* 2020;127:109009.
- 379 22. Ackermann M, Verleden SE, Kuehnel M, et al. Pulmonary Vascular Endothelialitis, Thrombosis,  
380 and Angiogenesis in Covid-19. *New England Journal of Medicine* 2020;383(2):120–8.

- 381 23. Matheson AM, McIntosh MJ, Kooner HK, et al. Persistent 129Xe MRI Pulmonary and CT Vascular  
382 Abnormalities in Symptomatic Individuals with Post-Acute COVID-19 Syndrome. *Radiology* 2022;
- 383 24. Kuehn BM. Cardiac Complications More Common After COVID-19 Than Vaccination. *JAMA*  
384 2022;327(20):1951.
- 385 25. Meringer H, Mehandru S. Gastrointestinal post-acute COVID-19 syndrome. *Nat Rev Gastroenterol*  
386 *Hepatol* 2022;19(6):345–6.
- 387 26. Costa ÍF, Bonifácio LP, Bellissimo-Rodrigues F, et al. Ocular findings among patients surviving  
388 COVID-19. *Sci Rep* 2021;11(1):11085.
- 389 27. What is long COVID? [Internet]. 2022 [cited 2023 Feb 10]; Available from: [https://www.ama-](https://www.ama-assn.org/delivering-care/public-health/what-long-covid)  
390 [assn.org/delivering-care/public-health/what-long-covid](https://www.ama-assn.org/delivering-care/public-health/what-long-covid)
- 391 28. National Healthcare Quality and Disparities Report: Chartbook on Healthcare for Veterans  
392 [Internet]. Rockville: 2020.
- 393 29. Peltzman T, Rice K, Jones KT, Washington DL, Shiner B. Optimizing Data on Race and Ethnicity for  
394 Veterans Affairs Patients. *Mil Med* 2022;187(7–8):e955–62.
- 395 30. World Health Organization. COVID-19 weekly epidemiological update, edition 133, 8 March 2023  
396 [Internet]. Geneva: World Health Organization; [cited 2023 May 5]. Available from:  
397 <https://apps.who.int/iris/handle/10665/366416>
- 398
